# Supplementary material for: IL-10 Protects Mice From the Lung Infection of Acinetobacter baumannii and Contributes to Bacterial Clearance by Regulating STAT3-Mediated MARCO Expression in Macrophages
Source: PubMed Central journal article supplement (PMC7047127; doi:10.3389/fimmu.2020.00270), 2020-02-21
Supplement: Image_2.pdf [file Image_2.pdf]

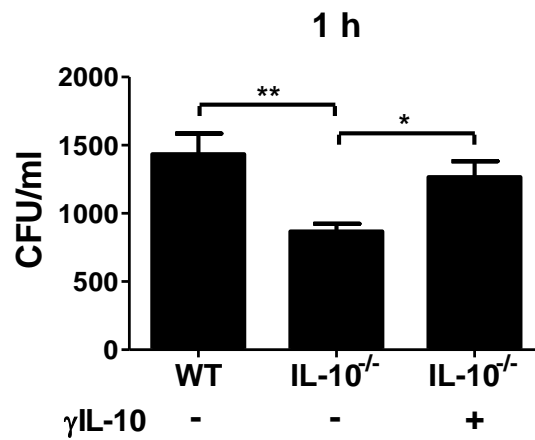

**Supplementary Figure 2. IL-10 enhances the bacterial phagocytosis ability of alveolar macrophages infected with *A. baumannii*.** (A, B) Alveolar macrophages from WT and IL-10-deficient mice were seeded at a density of  $2 \times 10^4$  cells/well and infected with *A. baumannii* at 1/10 MOI followed by gentamicin treatment 60 min after infection to remove extracellular bacteria. Live bacteria were then counted by plating onto LB agar supplemented with ampicillin (50  $\mu$ g/ml) at 1 h after infection. Results are expressed as means  $\pm$  SD. \* $P < 0.05$ , \*\* $P < 0.01$ .
